## 17 **Abstract**

18 Brazil is a dengue-endemic country where all four dengue virus serotypes circulate and cause  
19 seasonal epidemics. Recently, chikungunya and Zika viruses were also introduced. In Rio de Janeiro  
20 city, the three diseases co-circulated for the first time in 2015-2016, resulting in what is known as  
21 the ‘triple epidemic’. In this study, we identify space-time clusters of dengue, chikungunya, and  
22 Zika, to understand the dynamics and interaction between these simultaneously circulating  
23 arboviruses in a densely populated and heterogeneous city.

24 We conducted a spatio-temporal analysis of weekly notified cases of the three diseases in Rio de  
25 Janeiro city (July 2015 – January 2017), georeferenced by 160 neighbourhoods, using Kulldorff’s  
26 scan statistic with discrete Poisson probability models.

27 There were 26549, 13662, and 35905 notified cases of dengue, chikungunya, and Zika, respectively.  
28 The 17 dengue clusters and 15 Zika clusters were spread all over the city, while the 14 chikungunya  
29 clusters were more concentrated in the North and Downtown areas. Zika clusters persisted over a  
30 longer period of time. The multivariate scan statistic – used to analyse the three diseases  
31 simultaneously – detected 17 clusters, nine of which included all three diseases.

32 This is the first study exploring space-time clustering of dengue, chikungunya, and Zika in an intra-  
33 urban area. In general, the clusters did not coincide in time and space. This is probably the result of  
34 the competition between viruses for host resources, and of vector-control attitudes promoted by  
35 previous arbovirus outbreaks. The main affected area – the North region – is characterised by a  
36 combination of high population density and low human development index, highlighting the  
37 importance of targeting interventions in this area. Spatio-temporal scan statistics have the potential  
38 to direct interventions to high-risk locations in a timely manner and should be considered as part of  
39 the municipal surveillance routine as a tool to optimize prevention strategies.

40

## 41 **Author summary**

42 Dengue, an arboviral disease transmitted by *Aedes* mosquitoes, has been endemic in Brazil for  
43 decades, but vector-control strategies have not led to a significant reduction in the disease burden  
44 and were not sufficient to prevent chikungunya and Zika entry and establishment in the country. In  
45 Rio de Janeiro city, the first Zika and chikungunya epidemics were detected between 2015-2016,  
46 coinciding with a dengue epidemic. Understanding the behaviour of these diseases in a triple  
47 epidemic scenario is a necessary step for devising better interventions for prevention and outbreak  
48 response. We applied scan statistics analysis to detect spatio-temporal clustering for each disease  
49 separately and for all three simultaneously. In general, clusters were not detected in the same  
50 locations and time periods, possibly due to competition between viruses for host resources, and  
51 change in behaviour of the human population (e.g. intensified vector-control activities in response  
52 to increasing cases of a particular arbovirus). Neighbourhoods with high population density and  
53 social vulnerability should be considered as important targets for interventions. Particularly in the  
54 North region, where clusters of the three diseases exist and the first chikungunya cluster occurred.  
55 The use of space-time cluster detection can direct intensive interventions to high-risk locations in a  
56 timely manner.

57

## 58 **Introduction**

59 Dengue has been endemic in Brazil for more than 30 years. Since 2010, all four dengue virus  
60 (DENV) serotypes circulate in the country [1]. The first chikungunya and Zika outbreaks in Brazil  
61 were detected in 2014 and 2015, respectively, both in the Northeast region. In 2016, 1.5 million  
62 dengue cases, 270 thousand chikungunya cases, and more than 200 thousand Zika cases were  
63 notified in the country [2]. Initially described as a benign disease, Zika quickly became a serious  
64 public health problem after the association of the disease during pregnancy with congenital  
65 malformations, such as microcephaly, was discovered [3–5].

66 The co-circulation of DENV, chikungunya virus (CHIKV) and Zika virus (ZIKV), poses a  
67 serious public health and economic burden [6,7]. The Brazilian government has implemented  
68 dengue prevention and control measures in the form of vector-control interventions, but there is no  
69 evidence that vector-control has had a significant effect in reducing transmission in Brazil or other  
70 parts of the world [8]. The widespread presence of the vector (mainly *Aedes aegypti* but also *Aedes*  
71 *albopictus*), a highly mobile population, and low or lack of herd immunity resulted in simultaneous  
72 and overlapping outbreaks of all three diseases, a phenomenon that has been referred to as the  
73 ‘triple epidemic’. Understanding the behaviour of dengue, Zika, and chikungunya, when they  
74 compete in time and space, is a step forward in improving the design of interventions for prevention  
75 and outbreak response [9].

76 The Brazilian National Notifiable Diseases Information System (Sistema de Vigilância de  
77 Agravos de Notificação [SINAN]) is the Ministry of Health’s system for surveillance of diseases  
78 included in the national list of compulsory notification. Dengue has been a notifiable disease since  
79 1961, and chikungunya since 2011. Zika was only included in February 2016, but since June 2015  
80 Zika was monitored through sentinel surveillance [10,11]. Most notifications are made by  
81 physicians working in public health facilities, based on diagnostic protocols by the Ministry of  
82 Health. SINAN receives a large number of notifications and it thought to accurately represent the  
83 overall trend of the dengue situation in Brazil [12].

84 Considering DENV, CHIKV, and ZIKV share the same vectors and human hosts, we  
85 conducted a spatio-temporal analysis of notified cases to identify clusters and understand the  
86 dynamics of these diseases in a scenario of triple epidemics. Rio de Janeiro was the chosen city for  
87 this analysis for the following reasons: a history of large dengue epidemics with sustained  
88 transmission; the recent occurrence of CHIKV and ZIKV epidemics in 2015-2016; co-circulation  
89 of DENV, CHIKV and ZIKV; a high number of reported cases; the possibility to work with  
90 georeferenced cases in an intra-urban context; multiple environmental settings within the city; high

91 human mobility; vector abundance; and health professionals experienced in dealing with dengue as  
92 a result of the epidemiological scenario.

## 93 **Methods**

### 94 **Study site**

95 Rio de Janeiro is the second largest city in Brazil, with approximately 6,3 million inhabitants  
96 (2010 census), 1204 km<sup>2</sup> and 160 neighbourhoods (Fig 1). The city has the 45<sup>th</sup> highest Human  
97 Development Index (HDI) of the country, of 0.799 (varying from 0.604 to 0.959 inside the city)  
98 [13,14]. The population density is 5249 inhabitants per km<sup>2</sup>. Rio de Janeiro has a tropical climate,  
99 with temperature and rainfall varying depending on altitude, vegetation and ocean proximity. The  
100 average annual temperature is 23.7°C, and the annual accumulated precipitation is 1069 mm.  
101 During the summer months (December to March), high temperatures (around 40°C) and  
102 thunderstorms are common [15].

103 The 160 neighbourhoods are grouped into four large regions (North, South, Downtown and  
104 West), reflecting the geographical position and history of occupation. Almost all neighbourhoods  
105 are a mixture of very poor slums (“favelas”) and more affluent areas of residence. The North region  
106 is very urbanized, with high population density, few green areas and very large favelas. Nearly 27%  
107 of the population of this region, almost 2.4 million people, lived in favelas in the 2010 demographic  
108 census [16]. The South region is the most popular tourist destination in Rio de Janeiro, with famous  
109 beaches, green areas, and neighbourhoods with the highest HDI of the city [13]. The Downtown  
110 region is the historical, commercial and financial center of the city, with many green areas and  
111 cultural centers. Finally, the West region has been urbanized and populated more recently, and is  
112 less densely populated [15].

113 **Fig 1. Rio de Janeiro city population density and green areas, by region and neighbourhood,**  
114 **2010.** Map created using QGIS (version 3.4.3). Sources: Brazilian Institute of Geography and

115 Statistics (IBGE) and Instituto Pereira Passos – Rio de Janeiro City Hall, Brazil. Base map from  
116 Stamen Design and Open Street Maps.

## 117 **Data**

118 Data on dengue, chikungunya, and Zika cases were obtained from SINAN via the Rio de  
119 Janeiro Municipal Secretariat of Health, and are publicly available. The Municipal Secretariat of  
120 Health georeferenced 91% of dengue cases, 95% of chikungunya cases and 92% of Zika cases.

121 We analysed all cases of dengue, Zika and chikungunya occurring in Rio de Janeiro  
122 municipality between 27 July 2015 and 21 January 2017 (epidemiological weeks 30-2015 and 03-  
123 2017), grouped by epidemiological week and neighbourhood of residence. Population data by  
124 neighbourhood and shapefiles were obtained from the Instituto Pereira Passos (available at:  
125 <http://www.data.rio/>).

## 126 **Space-time analysis**

127 For spatio-temporal detection of clusters, Kulldorff's scan statistic with a discrete Poisson  
128 probability model was applied for each disease individually and for the three diseases  
129 simultaneously (multivariate scan statistic with multiple data sets). The scan statistic uses moving  
130 cylinders across space (i.e. the base of the cylinder) and time (i.e. the height of the cylinder) to  
131 identify clusters, by comparing the observed number of cases inside the cylinder to the expected  
132 number of cases [17,18]. The detected clusters are ordered in the results section according to the  
133 likelihood ratio, such that the cluster with the maximum likelihood ratio is the most likely cluster,  
134 that is, the cluster least likely to be due to chance. The relative risk for each cluster is calculated as  
135 the observed number of cases within the cluster divided by the expected number of cases within the  
136 cluster, divided by the observed number of cases outside the cluster divided by the expected number  
137 of cases outside the cluster [19].

138 The multivariate scan statistic for multiple data sets was applied to simultaneously search for  
139 clusters of dengue, Zika and chikungunya that coincided in time and space. This technique

140 calculates for each window the log likelihood ratio for each disease. Then, the likelihood for a  
141 particular window is calculated as the sum of the log likelihood ratios for the diseases with more  
142 than the expected number of cases. In the same way as for a single disease, the maximum of all the  
143 summed log likelihood ratios constitutes the most likely cluster [19,20].

144 For each model, Monte Carlo simulations (n=999) were performed to assess statistical  
145 significance. We considered statistically significant clusters (p-value < 0.05) that did not coincide in  
146 space (with no geographical overlap) and that included a maximum of 50% of the population of the  
147 city (nearly 3,1 million people). With only these parameters, two large clusters covering most of the  
148 city were detected (S1 Fig A), which is not useful if we are interest in identifying risk areas to direct  
149 interventions. After testing several combinations of temporal and spatial parameters (such as the  
150 size of the temporal window and maximum population at risk inside the cluster), we chose the  
151 combination that resulted in a reasonable number of clusters that aggregated close together and in  
152 similar locations that could also be targeted for local interventions (S1 Fig). The temporal window  
153 was set to be at least 1 week and a maximum of 4 weeks. Clusters were restricted to have at least 5  
154 cases. In the output parameters, clusters were restricted to include a maximum of 5% of the  
155 population of the city (nearly 315 thousand people).

156 SaTScan™ (version 9.5, <https://www.satscan.org/>) software was applied within R (version  
157 3.4.4, <https://www.r-project.org/>), using the package rsatscan (version 0.3.9200) [21–23]. Maps  
158 were produced using the ggplot2 (version 3.1.0) package in R [24].

## 159 **Results**

160 In Rio de Janeiro, between 27 July 2015 and 21 January 2017 (epidemiological weeks 30-  
161 2015 and 03-2017), 76116 cases of dengue, chikungunya, and Zika were reported (Table 1). More  
162 than 85% of neighbourhoods had at least 10 cases of each disease. Zika presented the highest  
163 number of notifications, resulting in an incidence of 568.1 cases per 100000 inhabitants. Most cases  
164 occurred between December 2015 and June 2016 (88.5%). The epidemic curves differed slightly in

165 time, with high incidence of all three diseases between April and June 2016 (Fig 2). In March 2016,  
166 Zika cases started to decrease while dengue and chikungunya cases were still on the increase. While  
167 dengue and Zika were active by the end of 2015, chikungunya cases only started to rise in March  
168 2016. Notifications of the three diseases declined after May. Interestingly, the shape of the Zika  
169 epidemic curve does not have a clear peak.

170 **Table 1. Notifications of dengue, chikungunya, and Zika cases between epidemiological weeks**  
171 **30-2015 and 03-2017 in Rio de Janeiro city, Brazil.**

|                                             | <b>Dengue</b> | <b>Chikungunya</b> | <b>Zika</b> |
|---------------------------------------------|---------------|--------------------|-------------|
| Total number of cases                       | 26549         | 13662              | 35905       |
| Incidence per 100000 inhabitants            | 420.0         | 216.2              | 568.1       |
| Maximum n° of cases per week                | 2094          | 1101               | 1799        |
| Week with maximum n° of cases               | 14-2016       | 17-2016            | 07-2016     |
| N° of neighbourhoods with at least 1 case   | 158           | 159                | 160         |
| N° of neighbourhoods with at least 10 cases | 147           | 136                | 155         |

172

173 **Fig 2. Number of reported dengue (dotted line), chikungunya (dashed line), and Zika (solid**  
174 **line) cases between 27 July 2015 and 21 Jan 2017, Rio de Janeiro city, Brazil.** Source: Sistema  
175 de Vigilância de Agravos de Notificação (SINAN) – Ministry of Health, Brazil.

176

### 177 **Dengue cases clusters**

178 Scan statistics detected 17 dengue cases clusters (Table 2). Clusters were detected in different  
179 parts of the city (Fig 3A). The most likely cluster was located in the North zone of Rio de Janeiro  
180 city. Cluster 2 contained only one neighbourhood in the Downtown area with a relative risk of  
181 172.67 (S2 Fig A). Clusters were detected within a short time period, from March to May 2016,  
182 except for cluster 15 that started in December 2015 (Fig 3B). The first dengue cluster in time was  
183 detected in the West zone (S3 Fig A).



184 **Table 2. Characteristics of dengue clusters between epidemiological weeks 30-2015 and 03-**  
 185 **2017, Rio de Janeiro city, Brazil. Clusters are ordered according to the maximum likelihood**  
 186 **ratio, with 1 being the most likely cluster.**

| Cluster | Time period (week) | Observed cases | Population | Relative risk |
|---------|--------------------|----------------|------------|---------------|
| 1       | 10 to 14-2016      | 1081           | 293943     | 17.56         |
| 2       | 12 to 16-2016      | 464            | 12556      | 172.67        |
| 3       | 13 to 17-2016      | 905            | 296392     | 14.48         |
| 4       | 13 to 17-2016      | 692            | 243125     | 13.39         |
| 5       | 11 to 15-2016      | 528            | 178123     | 13.87         |
| 6       | 13 to 17-2016      | 425            | 105515     | 18.78         |
| 7       | 13 to 17-2016      | 438            | 296540     | 6.88          |
| 8       | 12 to 16-2016      | 363            | 304235     | 5.54          |
| 9       | 16 to 17-2016      | 170            | 238838     | 13.15         |
| 10      | 13 to 17-2016      | 156            | 94626      | 7.61          |
| 11      | 12 to 16-2016      | 249            | 273908     | 4.20          |
| 12      | 10 to 14-2016      | 184            | 156688     | 5.42          |
| 13      | 14 to 18-2016      | 34             | 3361       | 46.50         |
| 14      | 12 to 15-2016      | 116            | 187930     | 3.79          |
| 15      | 52-2015 to 4-2016  | 79             | 101443     | 3.58          |
| 16      | 13 to 17-2016      | 147            | 311869     | 2.17          |
| 17      | 12 to 14-2016      | 30             | 69356      | 3.98          |

187

188 **Fig 3. (A) Dengue cases clusters and (B) temporal distribution of dengue cases by cluster,**  
 189 **between epidemiological weeks 30-2015 and 03-2017, Rio de Janeiro city, Brazil.** Map created  
 190 using R (version 3.4.4) with ggplot2 package (version 3.1.0). Sources: Sistema de Vigilância de  
 191 Agravos de Notificação (SINAN) – Ministry of Health, Brazil, and Instituto Pereira Passos – Rio de  
 192 Janeiro City Hall, Brazil.

193

#### 194 **Chikungunya cases clusters**

195 For chikungunya, 14 clusters were detected (Table 3). Unlike dengue, chikungunya clusters  
 196 were rarely seen in the West of Rio de Janeiro city, with clusters detected in only 7 neighbourhoods

197 of this region (Fig 4A, clusters 6, 9 and 13). The most likely cluster was located in the Downtown  
198 of Rio de Janeiro city and had the highest relative risk (S2 Fig B). Clusters were also detected  
199 within a restricted time period, between 27 March and 11 June (Fig 4B). The first chikungunya  
200 cluster in time occurred in the northern border of the city (S3 Fig B).

201 **Table 3. Characteristics of chikungunya clusters between epidemiological weeks 30-2015 and**  
202 **03-2017, Rio de Janeiro city, Brazil. Clusters are ordered according to the maximum**  
203 **likelihood ratio, with 1 being the most likely cluster.**

| Cluster | Time period (week) | Observed cases | Population | Relative risk |
|---------|--------------------|----------------|------------|---------------|
| 1       | 13 to 17-2016      | 462            | 154001     | 27.67         |
| 2       | 12 to 16-2016      | 439            | 235216     | 17.17         |
| 3       | 16 to 20-2016      | 478            | 312654     | 14.10         |
| 4       | 17 to 21-2016      | 409            | 314738     | 11.92         |
| 5       | 14 to 18-2016      | 353            | 313786     | 10.28         |
| 6       | 15 to 19-2016      | 243            | 243125     | 9.06          |
| 7       | 19 to 23-2016      | 251            | 284673     | 8.00          |
| 8       | 16 to 20-2016      | 248            | 309599     | 7.26          |
| 9       | 16 to 20-2016      | 121            | 105515     | 10.31         |
| 10      | 15 to 19-2016      | 166            | 314444     | 4.76          |
| 11      | 16 to 20-2016      | 95             | 94702      | 9.01          |
| 12      | 19 to 20-2016      | 34             | 60891      | 19.97         |
| 13      | 19 to 23-2016      | 98             | 277454     | 3.17          |
| 14      | 16 to 20-2016      | 67             | 251142     | 2.39          |

204

205 **Fig 4. (A) Chikungunya cases clusters and (B) temporal distribution of chikungunya cases by**  
206 **cluster, between epidemiological weeks 30-2015 and 03-2017, Rio de Janeiro city, Brazil.** Map  
207 created using R (version 3.4.4) with ggplot2 package (version 3.1.0). Sources: Sistema de  
208 Vigilância de Agravos de Notificação (SINAN) – Ministry of Health, Brazil, and Instituto Pereira  
209 Passos – Rio de Janeiro City Hall, Brazil.

210

211 **Zika cases clusters**

212 There were 15 Zika clusters, distributed all over the city, similar to the observed pattern for  
 213 dengue (Fig 5A, Table 4). The most likely cluster was located in the West of Rio de Janeiro city, a  
 214 region where chikungunya clusters were rarely observed. This cluster also had the highest relative  
 215 risk (S2 Fig C). In contrast to dengue and chikungunya, Zika clusters occurred over a longer period  
 216 of time, between December 2015 and May 2016 (Fig 5B). The third most likely cluster occurred 8  
 217 weeks after the first one. The first Zika clusters in time emerged in the North of the city (S3 Fig C).

218 **Table 4. Characteristics of Zika clusters between epidemiological weeks 30-2015 and 03-2017,**  
 219 **Rio de Janeiro city, Brazil. Clusters are ordered according to the maximum likelihood ratio,**  
 220 **with 1 being the most likely cluster.**

| Cluster | Time period (week) | Observed cases | Population | Relative risk |
|---------|--------------------|----------------|------------|---------------|
| 1       | 52-2015 to 4-2016  | 739            | 179689     | 14.23         |
| 2       | 49-2015 to 1-2016  | 496            | 236282     | 7.21          |
| 3       | 12 to 16-2016      | 517            | 275257     | 6.46          |
| 4       | 1 to 5-2016        | 545            | 309349     | 6.06          |
| 5       | 50-2015 to 1-2016  | 408            | 277724     | 6.71          |
| 6       | 13 to 17-2016      | 480            | 307234     | 5.36          |
| 7       | 6 to 10-2016       | 358            | 170799     | 7.18          |
| 8       | 6 to 10-2016       | 389            | 231774     | 5.75          |
| 9       | 49-2015 to 1-2016  | 426            | 294447     | 4.96          |
| 10      | 15 to 18-2016      | 355            | 297833     | 5.44          |
| 11      | 48 to 52-2015      | 362            | 298052     | 4.16          |
| 12      | 3 to 7-2016        | 314            | 233051     | 4.61          |
| 13      | 6 to 10-2016       | 347            | 289188     | 4.10          |
| 14      | 7 to 11-2016       | 357            | 306508     | 3.98          |
| 15      | 50-2015 to 2-2016  | 112            | 72058      | 5.29          |

221  
 222 **Fig 5. (A) Zika cases clusters and (B) temporal distribution of Zika cases by cluster, between**  
 223 **epidemiological weeks 30-2015 and 03-2017, Rio de Janeiro city, Brazil.** Map created using R  
 224 (version 3.4.4) with ggplot2 package (version 3.1.0). Sources: Sistema de Vigilância de Agravos de

225 Notificação (SINAN) – Ministry of Health, Brazil, and Instituto Pereira Passos – Rio de Janeiro  
226 City Hall, Brazil.

227

## 228 **Dengue, chikungunya, and Zika multivariate clusters**

229 The multivariate scan statistic for multiple data sets detected 17 clusters, of which nine  
230 showed dengue, chikungunya, and Zika occurring simultaneously; five showed overlapping dengue  
231 and Zika outbreaks; and three showed only outbreaks of Zika (Table 5, Fig 6). The most likely  
232 cluster was found in the Downtown region of the city.

233 Of the 160 neighbourhoods assessed, 57 (35,6%) had clusters for the three diseases coinciding  
234 in time and space. Of the nine simultaneous clusters, five were located in the North of the city, three  
235 in the West, and one in the Downtown.

236 **Table 5. Characteristics of clusters of dengue, chikungunya, and Zika detected using**  
237 **multivariate scan statistic, between epidemiological weeks 30-2015 and 03-2017, Rio de**  
238 **Janeiro city, Brazil. Clusters are ordered according to the maximum likelihood ratio, with 1**  
239 **being the most likely cluster.**

| Cluster | Time period       | Population | Dengue        | Chikungunya   | Zika          |
|---------|-------------------|------------|---------------|---------------|---------------|
|         | (week)            |            | relative risk | relative risk | relative risk |
| 1       | 12 to 16-2016     | 154001     | 22.26         | 26.99         | 7.80          |
| 2       | 13 to 17-2016     | 307234     | 14.08         | 8.13          | 5.36          |
| 3       | 10 to 14-2016     | 293943     | 17.56         | 3.08          | 3.39          |
| 4       | 12 to 16-2016     | 178123     | 13.84         | 9.12          | 5.83          |
| 5       | 13 to 17-2016     | 243125     | 13.39         | 6.15          | 1.48          |
| 6       | 52-2015 to 4-2016 | 179689     | 1.35          | NA            | 14.23         |
| 7       | 13 to 17-2016     | 313786     | 6.64          | 8.94          | 2.97          |
| 8       | 14 to 18-2016     | 105515     | 18.42         | 8.17          | 1.74          |
| 9       | 12 to 16-2016     | 285585     | 5.61          | 7.68          | 4.12          |
| 10      | 12 to 15-2016     | 309349     | 5.63          | NA            | 5.65          |
| 11      | 49-2015 to 1-2016 | 236282     | NA            | NA            | 7.21          |
| 12      | 17 to 21-2016     | 309599     | 4.78          | 6.72          | 1.58          |

|    |                   |        |      |    |      |
|----|-------------------|--------|------|----|------|
| 13 | 7 to 11-2016      | 170799 | 2.10 | NA | 7.16 |
| 14 | 10 to 14-2016     | 156688 | 5.42 | NA | 5.34 |
| 15 | 3 to 7-2016       | 233051 | NA   | NA | 4.61 |
| 16 | 7 to 11-2016      | 306508 | NA   | NA | 3.98 |
| 17 | 50-2015 to 2-2016 | 30600  | 2.85 | NA | 8.22 |

---

240

241 **Fig 6. Clusters of dengue, chikungunya, and Zika detected using the multivariate scan**  
242 **statistic, between epidemiological weeks 30-2015 and 03-2017, Rio de Janeiro city, Brazil.** Map  
243 created using R (version 3.4.4) with ggplot2 package (version 3.1.0). Sources: Sistema de  
244 Vigilância de Agravos de Notificação (SINAN) – Ministry of Health, Brazil, and Instituto Pereira  
245 Passos – Rio de Janeiro City Hall, Brazil.

246

## 247 **Discussion**

248 This is the first study exploring space-time clustering of dengue, chikungunya, and Zika in an  
249 intra-urban region. The data analysed is rare and of great value, as it includes triple epidemics with  
250 a large number of cases. Also, this study included the first ever epidemics of chikungunya and Zika  
251 in Rio de Janeiro city.

252 Dengue, chikungunya, and Zika cases were notified across the whole city. The epidemic  
253 curves varied slightly in time, with peaks occurring in different weeks. The Zika epidemic curve did  
254 not show a clear peak. By stratifying the Zika cases by 10 administrative units of the city (S4 Fig),  
255 we hypothesise that the format of the cumulative epidemic curve for the whole city is partially a  
256 result of Zika affecting different regions of the city at different times. The number of cases of the  
257 three diseases declined after May, coinciding with the end of the rainy and warm season. This  
258 reflects the vectors ecology, as *Ae. aegypti* and *Ae. albopictus* breed in pools of water and  
259 temperatures around 25-30°C accelerate the reproductive cycle and increase infectivity and  
260 transmissibility [25,26]. In a study in Recife, Northeast Brazil, the simultaneous decrease of Zika  
261 and increase of chikungunya cases was also observed. The authors interpreted this as a

262 displacement of Zika caused by chikungunya [27]. For Rio de Janeiro city, this might not be the  
263 case, as CHIKV caused only a few cases at beginning of 2016, and only started to rise when Zika  
264 cases decreased (the depletion of susceptible hosts). Therefore, we hypothesise that ZIKV  
265 circulation inhibited CHIKV, rather than CHIKV introduction displacing ZIKV.

266 Scan analysis successfully identified clusters of dengue, chikungunya, and Zika. The most  
267 likely cluster for each disease occurred in a different part of the city (North, Downtown, and West,  
268 respectively). Unlike for dengue and Zika, chikungunya clusters were rarely detected in the West of  
269 Rio de Janeiro, probably because the rainy and warm season ended before the disease could reach  
270 this region with a sufficient transmission rate to form clusters.

271 Zika clusters were detected over a longer period of time compared to dengue and  
272 chikungunya clusters. We hypothesise that this is a result of the ZIKV advantage in competing for  
273 *Ae. aegypti* mosquitoes: the *Ae. aegypti* has been described as a more efficient vector for ZIKV  
274 transmission than for DENV or CHIKV, even when co-infected [28,29]. Not only does *Ae. aegypti*  
275 transmit ZIKV at a higher rate, but it is also more easily infected by ZIKV compared to DENV and  
276 CHIKV. CHIKV, on the other hand, replicates better than ZIKV in *Ae. albopictus* cells [28]. While  
277 *Ae. aegypti* is highly adapted in urban settings, living preferably in domestic and peridomestic  
278 areas, *Ae. albopictus* prefers to live in areas with more vegetation. However, *Ae. albopictus* was  
279 recently identified distant from green areas in a densely urbanized complex of favelas in Rio de  
280 Janeiro, suggesting this species is adapting to anthropic environments [30]. Further studies are  
281 needed to understand the importance of *Ae. albopictus* in CHIKV transmission.

282 A previous study suggested that a Zika epidemic would prevent a subsequent dengue  
283 epidemic, as a consequence of cross-immunity [31]. Like DENV, ZIKV is a flavivirus, and the  
284 structural similarity between them results in cross-immunity. [32] Whether this cross-immunity  
285 leads to antibody-dependent enhancement (ADE, that results in more severe forms of the disease),  
286 protection, or neither, is still uncertain [33–35]. In our study, the number of dengue cases increased

287 after the peak of Zika cases. Additionally, some locations with Zika clusters also experienced  
288 dengue clusters afterwards. Zika and dengue clusters were spread all over the city. It seems as  
289 though herd immunity to dengue did not have a significant impact on the dynamics of Zika or  
290 dengue. In the study period, DENV-4 was the most prevalent dengue serotype, followed by DENV-  
291 1. These serotypes were previously responsible for the majority of dengue cases in 2011 (DENV-1)  
292 and 2012-2013 (DENV-4). The co-circulation of the 4 dengue serotypes and Zika in the city  
293 reinforce the need for active disease surveillance. The consequences of previous DENV exposure to  
294 Zika clinical outcomes (and vice-versa) are not clear. By the time the epidemic of congenital Zika  
295 syndrome in Brazil was detected, many researchers questioned if it was related to the mother's anti-  
296 DENV antibodies. There is no sufficient evidence to confirm this hypothesis. However, considering  
297 the severe consequences of congenital Zika syndrome, disease surveillance using spatio-temporal  
298 scan statistics should be considered to identify high risk areas for Zika in a timely manner and to  
299 direct preventive measures to the most at risk areas.

300 Dengue, chikungunya, and Zika clusters detected in Rio de Janeiro do not usually coincided  
301 in time and space, contrasting with a study in Mexico that found strong spatio-temporal coherence  
302 in the distribution of the three diseases [9]. In addition to virus interactions and competition for the  
303 resources for replication inside the vector, behaviour changes may also impact disease dynamics. A  
304 rise in the number of cases may promote vector-control activities, which in turn may decrease the  
305 number of cases and hinder the establishment of another arbovirus [36]. Also, wealthier areas may  
306 have better vector-control interventions, resulting in different spatial distributions.

307 Neighbourhoods in the North of the city were more likely to have simultaneous clusters of  
308 dengue, Zika and chikungunya, highlighted these areas as priority targets for interventions. This is  
309 especially important considering co-infections are possible and clinical outcomes are not clear for  
310 such cases [37]. As dengue has been endemic in Rio de Janeiro for the last three decades and  
311 notification of Zika cases was only established in the municipality in October 2015, it was only

312 possible to detect the first disease cluster for chikungunya and pinpoint its source in the North of the  
313 city, highlighting once again the importance of interventions in this area. The North of Rio de  
314 Janeiro has already been identified as a hot spot for dengue and as a key region for dengue  
315 diffusion. Previous studies also identified Catumbi, a neighbourhood in the Downtown area, as a  
316 high-risk location for dengue [38,39]. In our findings, Catumbi comprised the most likely  
317 chikungunya cluster, the second most likely cluster for dengue and the third most likely for Zika.  
318 Additionally, the clusters in Catumbi coincided in time (most likely cluster in the multivariate scan  
319 analysis). Further investigations should be conducted to understand why this neighbourhood in  
320 particular is a high-risk location for arboviruses.

321         The North of the city is marked by a combination of high population density and a lower HDI  
322 than the city average [13]. The high population density facilitates the mosquito-human contact and  
323 hence the chance of becoming infected. The link between poverty and arbovirus is controversial  
324 [40]. Nonetheless, locations with social and economic vulnerability more likely have poorer  
325 sanitary conditions and less efficient vector-control interventions, which would facilitate mosquito  
326 proliferation. In Rio de Janeiro city, areas in or near favelas were detected as hot spots for dengue  
327 [39]. Consistent with our findings, a study conducted in French Guiana indicated that, early in the  
328 epidemic, the poorest neighbourhoods would have a greater risk for CHIKV infection [41]. In the  
329 first dengue epidemic in a city of São Paulo state, Brazil, authors found a direct relationship  
330 between low socio-economic conditions and dengue [42]. We did not observe this relationship for  
331 dengue possibly because dengue has already had sustained transmission in the city for decades.

332         Some limitations affect this study. As our study population included only notified cases (i.e.  
333 only patients who sought medical care), asymptomatic cases were not captured. Mild cases usually  
334 are poorly captured by SINAN, but considering the disease awareness around Zika, people  
335 (especially women) were expected to be more concerned about seeking medical care in case of  
336 suspected Zika. As Zika, dengue and chikungunya share some symptoms, the disease awareness



337 may have boosted the notification of mild cases of the three diseases. The similar clinical  
338 manifestations of dengue, Zika, and chikungunya also represent a limitation. This limitation is  
339 inherent of every study using notified cases, as only a small proportion of cases are laboratory  
340 confirmed. However, if misdiagnosis was common, we would not expect to detect differences in  
341 time and space of occurrences. In addition, the extensive experience of health care professionals  
342 working in Rio de Janeiro, in detecting and diagnosing dengue symptoms, is thought to reduce the  
343 probability of misdiagnosis.

344 A small percentage of cases (8%) that were not georeferenced (and hence, not included in this  
345 study) could potentially result in a selection bias. It is possible that cases occurring in favelas, where  
346 addresses are sometimes not standardized, have a higher chance of not being georeferenced.  
347 Clustering was based on the neighbourhood of residence only, yet infection can happen at other  
348 places, such as the workplace. Scan analysis was not designed to understand diseases trajectory but  
349 are still helpful to help plan interventions. Also, the method detects circular clusters only, rather  
350 than clusters of irregular shapes.

351 Vector-control strategies have not been effective in abating dengue or in preventing the entry  
352 of Zika and chikungunya in Rio de Janeiro. The identification of clusters in space and time allows  
353 actions to be intensified in high-risk locations in a timely manner. Special attention should be given  
354 to neighbourhoods with high population density and social vulnerability. As vector-control relies on  
355 community participation, it is important to enhance community engagement and build trust among  
356 all members of the community. People living in neighbourhoods with poor sanitation and a low  
357 development index may be less likely to adhere and to maintain prevention activities. Measures to  
358 reduce inequity should be accompanied by sustained community engagement [36]. Finally, we  
359 suggest the implementation of spatio-temporal scan statistics in the municipal surveillance routine  
360 as a tool to optimize prevention strategies.

361

## 362 **Acknowledgements**

363       The authors would like to thank the Municipal Secretariat of Health for providing the data on  
364 reported cases, and Dr. Reinaldo Souza dos Santos (Escola Nacional de Saúde Pública Sergio  
365 Arouca) and Dr. Valéria Saraceni (Municipal Secretary of Health and Civil Defense, City Hall of  
366 Rio de Janeiro) for reviewing and providing helpful feedback.

## 367 **References**

1. Nogueira RM, Eppinghaus AL. Dengue virus type 4 arrives in the state of Rio de Janeiro: a challenge for epidemiological surveillance and control. *Memórias do Instituto Oswaldo Cruz*. 2011;106: 255–256. doi:10.1590/S0074-02762011000300001
2. Brasil. Ministério da Saúde. Monitoramento dos casos de dengue, febre de chikungunya e febre pelo vírus Zika até a Semana Epidemiológica 52, 2016. *Boletim Epidemiológico*. 2017;48. Available: <http://portalarquivos.saude.gov.br/images/pdf/2017/abril/06/2017-002-Monitoramento-dos-casos-de-dengue--febre-de-chikungunya-e-febre-pelo-v--rus-Zika-ate-a-Semana-Epidemiologica-52--2016.pdf>
3. Brasil. Ministério da Saúde. Situação epidemiológica de ocorrência de microcefalias no Brasil, 2015. *Boletim Epidemiológico*. 2015;46. Available: <http://portalarquivos.saude.gov.br/images/pdf/2015/novembro/19/Microcefalia-bol-final.pdf>
4. Jaenisch T, Rosenberger KD, Brito C, Brady O, Brasil P, Marques ET. Risk of microcephaly after Zika virus infection in Brazil, 2015 to 2016. *Bulletin of the World Health Organization*. 2017;95: 191–198. doi:10.2471/BLT.16.178608
5. PAHO. Timeline of Emergence of Zika virus in the Americas. In: Pan American Health Organization / World Health Organization [Internet]. 17 Jan 2017 [cited 22 Nov 2017]. Available: [http://www.paho.org/hq/index.php?option=com\\_content&view=article&id=11959%3Atimeline-of-emergence-of-zika-virus-in-the-americas&catid=8424%3Acontents&Itemid=41711&lang=en](http://www.paho.org/hq/index.php?option=com_content&view=article&id=11959%3Atimeline-of-emergence-of-zika-virus-in-the-americas&catid=8424%3Acontents&Itemid=41711&lang=en)
6. Nunes MRT, Faria NR, de Vasconcelos JM, Golding N, Kraemer MU, de Oliveira LF, et al. Emergence and potential for spread of Chikungunya virus in Brazil. *BMC Medicine*. 2015;13. doi:10.1186/s12916-015-0348-x

7. Hennessey M, Fischer M, Staples JE. Zika Virus Spreads to New Areas — Region of the Americas, May 2015–January 2016. *MMWR Morbidity and Mortality Weekly Report*. 2016;65: 55–58. doi:10.15585/mmwr.mm6503e1
8. Haug CJ, Kieny MP, Murgue B. The Zika Challenge. *New England Journal of Medicine*. 2016;374: 1801–03. doi:10.1056/NEJMp1603734
9. Bisanzio D, Dzul-Manzanilla F, Gomez-Dantés H, Pavia-Ruz N, Hladish TJ, Lenhart A, et al. Spatio-temporal coherence of dengue, chikungunya and Zika outbreaks in Merida, Mexico. Vasilakis N, editor. *PLOS Neglected Tropical Diseases*. 2018;12: e0006298. doi:10.1371/journal.pntd.0006298
10. Brasil. Ministério da Saúde. Nota informativa - SVS/MS. Assunto: Procedimentos a serem adotados para a vigilância da Febre do vírus Zika no Brasil. [Internet]. 2016. Available: <http://portalarquivos2.saude.gov.br/images/pdf/2016/marco/07/Nota-Informativa-zika.pdf>
11. Oliveira WK de, França GVA de, Carmo EH, Duncan BB, Kuchenbecker R de S, Schmidt MI. Infection-related microcephaly after the 2015 and 2016 Zika virus outbreaks in Brazil: a surveillance-based analysis. *The Lancet*. 2017;390: 861–870. doi:10.1016/S0140-6736(17)31368-5
12. Barbosa JR, Barrado JC dos S, Zara AL de SA, Siqueira JB. Avaliação da qualidade dos dados, valor preditivo positivo, oportunidade e representatividade do sistema de vigilância epidemiológica da dengue no Brasil, 2005 a 2009. *Epidemiologia e Serviços de Saúde*. 2015;24: 49–58. doi:10.5123/S1679-49742015000100006
13. Brasil. Instituto Pereira Passos. IDH-M: Uma análise do Índice de Desenvolvimento Humano Municipal para a Cidade do Rio de Janeiro. In: Prefeitura do Rio de Janeiro [Internet]. [cited 1

Jul 2018]. Available:

[http://www.rio.rj.gov.br/dlstatic/10112/6165511/4162028/analise\\_idhm\\_rio\\_v4\\_compur.pdf](http://www.rio.rj.gov.br/dlstatic/10112/6165511/4162028/analise_idhm_rio_v4_compur.pdf)

14. Atlas do Desenvolvimento Humano no Brasil. Ranking do IDH dos Municípios e Estados do Brasil. In: Ranking | Atlas do Desenvolvimento Humano no Brasil [Internet]. [cited 13 Dec 2018]. Available: <http://www.atlasbrasil.org.br/2013/pt/ranking/>
15. Prefeitura do Rio de Janeiro. Rio em Síntese. In: Data Rio [Internet]. [cited 11 Jun 2018]. Available: <http://www.data.rio/pages/rio-em-sntese-2>
16. Cavallieri F, Vial A. Favelas na cidade do Rio de Janeiro: o quadro populacional com base no Censo 2010 [Internet]. Rio de Janeiro, RJ: Instituto Pereira Passos; 2012 p. 20. Report No.: 20120501. Available: [http://portalgeo.rio.rj.gov.br/estudoscariocas/download%5C3190\\_FavelasnacidadedoRiodeJaneiro\\_Censo\\_2010.PDF](http://portalgeo.rio.rj.gov.br/estudoscariocas/download%5C3190_FavelasnacidadedoRiodeJaneiro_Censo_2010.PDF)
17. Kulldorff M. A spatial scan statistic. *Communications in Statistics - Theory and Methods*. 1997;26: 1481–1496. doi:10.1080/03610929708831995
18. Kulldorff M, Athas WF, Feurer EJ, Miller BA, Key CR. Evaluating cluster alarms: a space-time scan statistic and brain cancer in Los Alamos, New Mexico. *Am J Public Health*. 1998;88: 1377–1380.
19. Kulldorff M. SaTScan™ User Guide for version 9.6 [Internet]. 2018. Available: [https://www.satscan.org/cgi-bin/satscan/register.pl/SaTScan\\_Users\\_Guide.pdf?todo=process\\_userguide\\_download](https://www.satscan.org/cgi-bin/satscan/register.pl/SaTScan_Users_Guide.pdf?todo=process_userguide_download)
20. Kulldorff M, Mostashari F, Duczmal L, Katherine Yih W, Kleinman K, Platt R. Multivariate scan statistics for disease surveillance. *Statistics in Medicine*. 2007;26: 1824–1833. doi:10.1002/sim.2818

21. Kulldorff M. SaTScan [Internet]. Available: <https://www.satscan.org/>
22. The R Foundation for Statistical Computing. R [Internet]. The R Foundation; Available: <https://www.r-project.org/>
23. Kleinman K. rsatscan: Tools, Classes, and Methods for Interfacing with SaTScan Stand-Alone Software [Internet]. 2015. Available: <https://CRAN.R-project.org/package=rsatscan>
24. Wickham H. ggplot2: Elegant Graphics for Data Analysis. Springer-Verlag [Internet]. 2016. Available: <https://ggplot2.tidyverse.org/>
25. Liu-Helmersson J, Stenlund H, Wilder-Smith A, Rocklöv J. Vectorial Capacity of *Aedes aegypti*: Effects of Temperature and Implications for Global Dengue Epidemic Potential. Moreira LA, editor. PLoS ONE. 2014;9: e89783. doi:10.1371/journal.pone.0089783
26. Alto BW, Bettinardi D. Temperature and Dengue Virus Infection in Mosquitoes: Independent Effects on the Immature and Adult Stages. *Am J Trop Med Hyg.* 2013;88: 497–505. doi:10.4269/ajtmh.12-0421
27. Magalhaes T, Braga C, Cordeiro MT, Oliveira AL, Castanha PM, Maciel APR, et al. Zika virus displacement by a chikungunya outbreak in Recife, Brazil. *PLOS Neglected Tropical Diseases.* 2017;11: e0006055.
28. Göertz GP, Vogels CBF, Geertsema C, Koenraadt CJM, Pijlman GP. Mosquito co-infection with Zika and chikungunya virus allows simultaneous transmission without affecting vector competence of *Aedes aegypti*. Rasgon JL, editor. *PLOS Neglected Tropical Diseases.* 2017;11: e0005654. doi:10.1371/journal.pntd.0005654
29. Chaves BA, Orfano AS, Nogueira PM, Rodrigues NB, Campolina TB, Nacif-Pimenta R, et al. Coinfection with Zika Virus (ZIKV) and Dengue Virus Results in Preferential ZIKV

- Transmission by Vector Bite to Vertebrate Host. *The Journal of Infectious Diseases*. 2018; doi:10.1093/infdis/jiy196
30. Ayllón T, Câmara DCP, Morone FC, Gonçalves L da S, Saito Monteiro de Barros F, Brasil P, et al. Dispersion and oviposition of *Aedes albopictus* in a Brazilian slum: Initial evidence of Asian tiger mosquito domiciliation in urban environments. Morrison AC, editor. *PLOS ONE*. 2018;13: e0195014. doi:10.1371/journal.pone.0195014
  31. Ribeiro GS, Kikuti M, Tauro LB, Nascimento LCJ, Cardoso CW, Campos GS, et al. Does immunity after Zika virus infection cross-protect against dengue? *The Lancet Global Health*. 2018;6: e140–e141. doi:10.1016/S2214-109X(17)30496-5
  32. Culshaw A, Mongkolsapaya J, Sreaton GR. The immunopathology of dengue and Zika virus infections. *Current Opinion in Immunology*. 2017;48: 1–6. doi:10.1016/j.coi.2017.07.001
  33. Bardina SV, Bunduc P, Tripathi S, Duehr J, Frere JJ, Brown JA, et al. Enhancement of Zika virus pathogenesis by preexisting anti-flavivirus immunity. *Science*. 2017;356: 175–180. doi:10.1126/science.aal4365
  34. Robbiani DF, Bozzacco L, Keefe JR, Khouri R, Olsen PC, Gazumyan A, et al. Recurrent Potent Human Neutralizing Antibodies to Zika Virus in Brazil and Mexico. *Cell*. 2017;169: 597-609.e11. doi:10.1016/j.cell.2017.04.024
  35. Martín-Acebes MA, Saiz J-C, Jiménez de Oya N. Antibody-Dependent Enhancement and Zika: Real Threat or Phantom Menace? *Frontiers in Cellular and Infection Microbiology*. 2018;8. doi:10.3389/fcimb.2018.00044

36. Carvalho MS, Honorio NA, Garcia LMT, Carvalho LC de S. *Aedes aegypti* control in urban areas: A systemic approach to a complex dynamic. Reiner RC, editor. *PLOS Neglected Tropical Diseases*. 2017;11: e0005632. doi:10.1371/journal.pntd.0005632
37. Carrillo-Hernández MY, Ruiz-Saenz J, Villamizar LJ, Gómez-Rangel SY, Martínez-Gutierrez M. Co-circulation and simultaneous co-infection of dengue, chikungunya, and zika viruses in patients with febrile syndrome at the Colombian-Venezuelan border. *BMC Infectious Diseases*. 2018;18. doi:10.1186/s12879-018-2976-1
38. Xavier DR, Magalhães M de AFM, Gracie R, Reis IC dos, Matos VP de, Barcellos C. Difusão espaço-tempo do dengue no Município do Rio de Janeiro, Brasil, no período de 2000-2013. *Cadernos de Saúde Pública*. 2017;33. doi:10.1590/0102-311x00186615
39. Carvalho S, Magalhães MDAFM, Medronho RDA. Analysis of the spatial distribution of dengue cases in the city of Rio de Janeiro, 2011 and 2012. *Revista de Saúde Pública*. 2017;51. doi:10.11606/s1518-8787.2017051006239
40. Mulligan K, Dixon J, Joanna Sinn C-L, Elliott SJ. Is dengue a disease of poverty? A systematic review. *Pathogens and Global Health*. 2015;109: 10–18. doi:10.1179/2047773214Y.0000000168
41. Bonifay T, Douine M, Bonnefoy C, Hurpeau B, Nacher M, Djossou F, et al. Poverty and Arbovirus Outbreaks: When Chikungunya Virus Hits More Precarious Populations Than Dengue Virus in French Guiana. *Open Forum Infectious Diseases*. 2017;4. doi:10.1093/ofid/ofx247
42. Farinelli EC, Baquero OS, Stephan C, Chiaravalloti-Neto F. Low socioeconomic condition and the risk of dengue fever: A direct relationship. *Acta Tropica*. 2018;180: 47–57. doi:10.1016/j.actatropica.2018.01.005



## 368 **Supporting Information**

369 **S1 Fig. Detection of Zika cases clusters according to different temporal and spatial**  
370 **parameters. A) Default parameters. B) Maximum temporal window of 1 week. C) Maximum**  
371 **temporal window of 4 weeks. D) Maximum temporal window of 4 weeks and maximum of 5%**  
372 **of population at risk. E) Maximum temporal window of 4 weeks and maximum of 1% of**  
373 **population at risk.** Maps were created using R (version 3.4.4) with ggplot2 package (version  
374 3.1.0). Sources: Sistema de Vigilância de Agravos de Notificação (SINAN) – Ministry of Health,  
375 Brazil, and Instituto Pereira Passos – Rio de Janeiro City Hall, Brazil.

376 **S2 Fig. Relative risks of clusters of (A) dengue, (B) chikungunya, and (C) Zika, detected**  
377 **between epidemiological weeks 30-2015 and 03-2017 in Rio de Janeiro city, Brazil.** Maps were  
378 created using R (version 3.4.4) with ggplot2 package (version 3.1.0). Sources: Sistema de  
379 Vigilância de Agravos de Notificação (SINAN) – Ministry of Health, Brazil, and Instituto Pereira  
380 Passos – Rio de Janeiro City Hall, Brazil.

381 **S3 Fig. Week of cluster detection for (A) dengue, (B) chikungunya, and (C) Zika, in Rio de**  
382 **Janeiro city, Brazil.** Maps were created using R (version 3.4.4) with ggplot2 package (version  
383 3.1.0). Sources: Sistema de Vigilância de Agravos de Notificação (SINAN) – Ministry of Health,  
384 Brazil, and Instituto Pereira Passos – Rio de Janeiro City Hall, Brazil.

385 **S4 Fig. Distribution of Zika cases notifications by week and administrative units**  
386 **(programmatic area – AP) of Rio de Janeiro city city.** Source: Sistema de Vigilância de Agravos  
387 de Notificação (SINAN) – Ministry of Health, Brazil.

**A**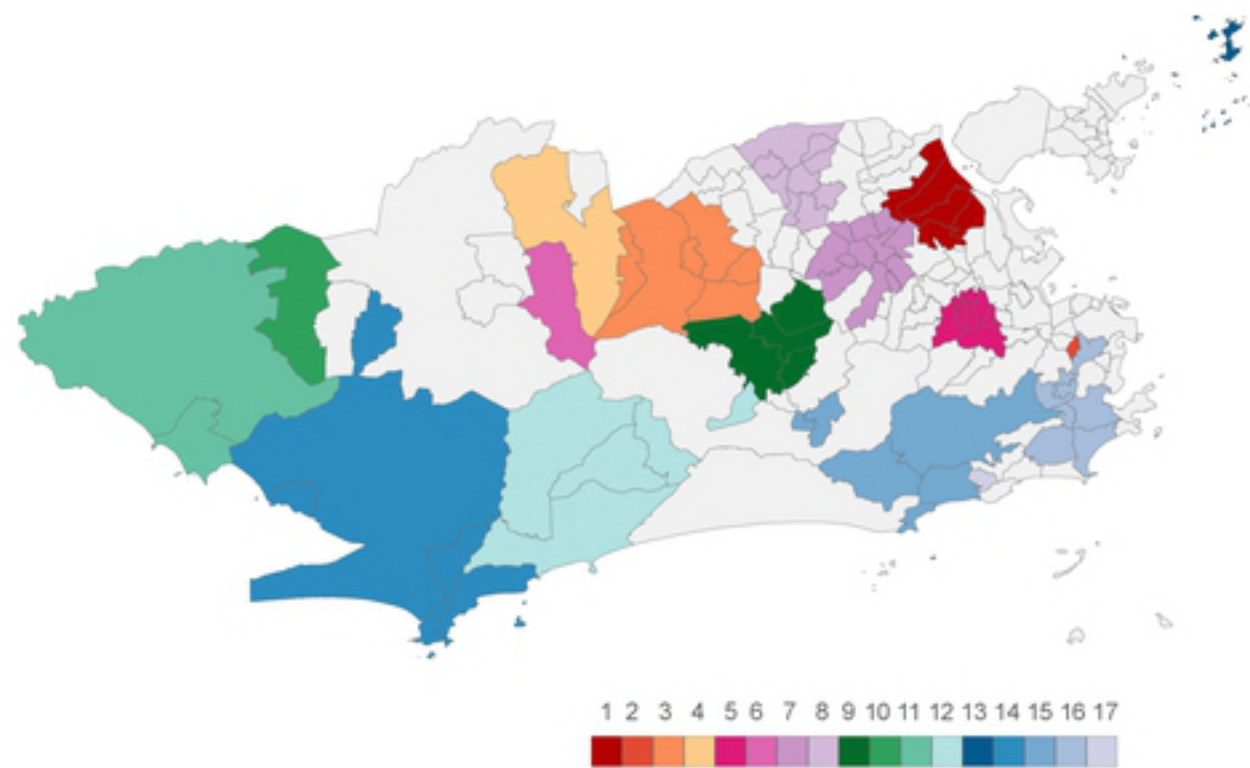**B**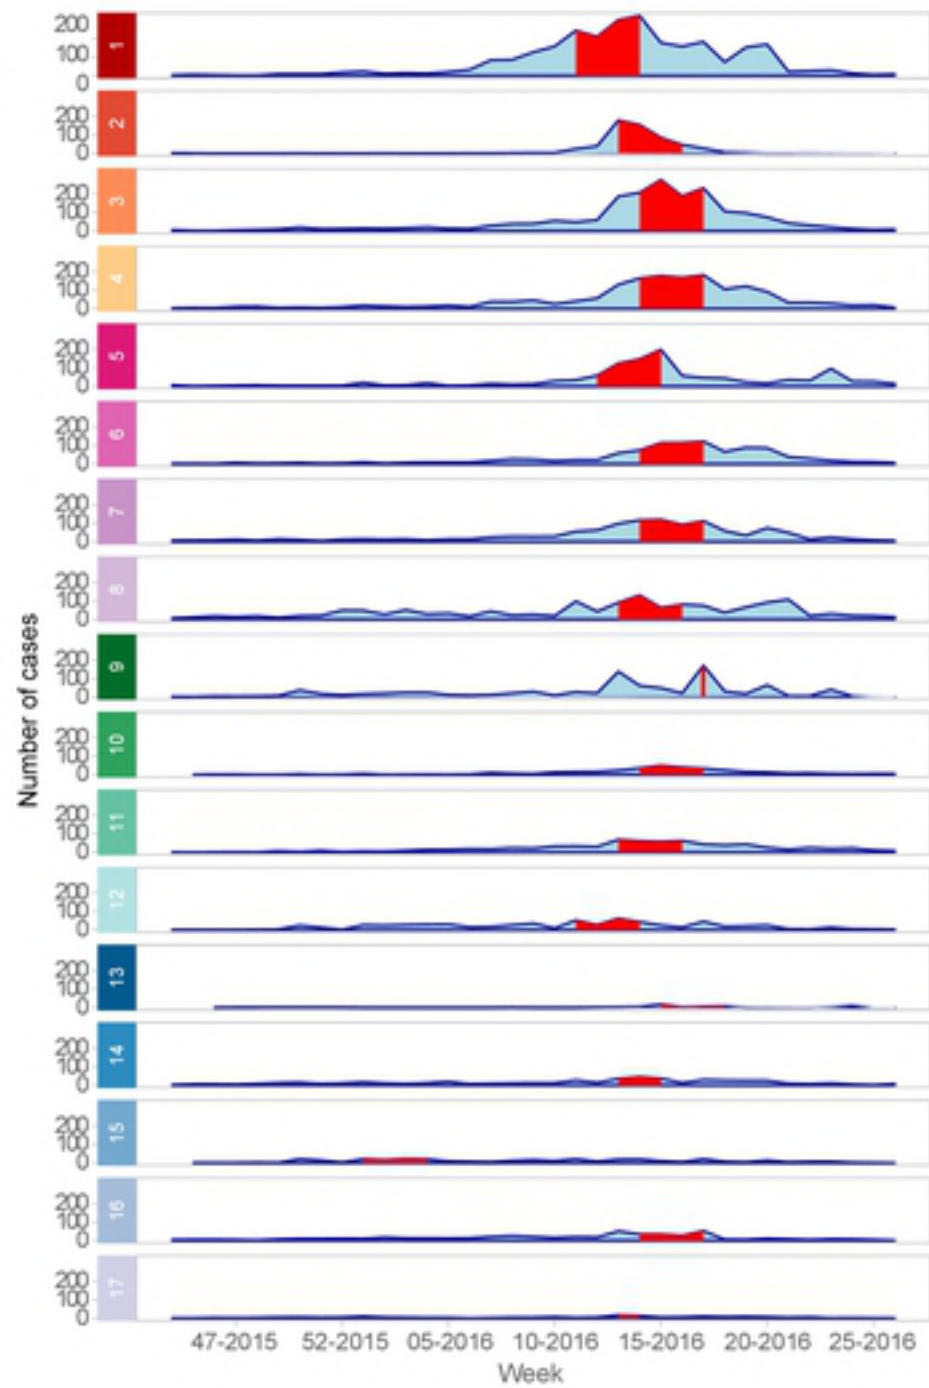**Fig3**

A

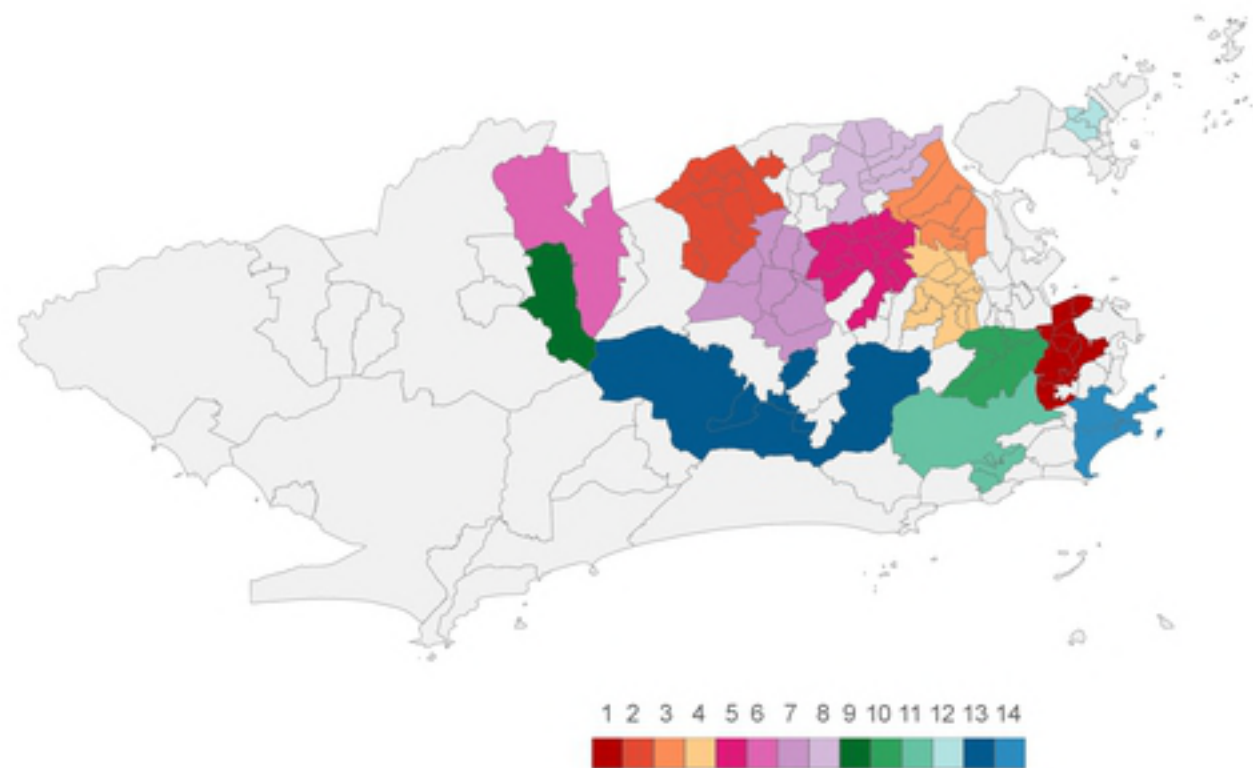

B

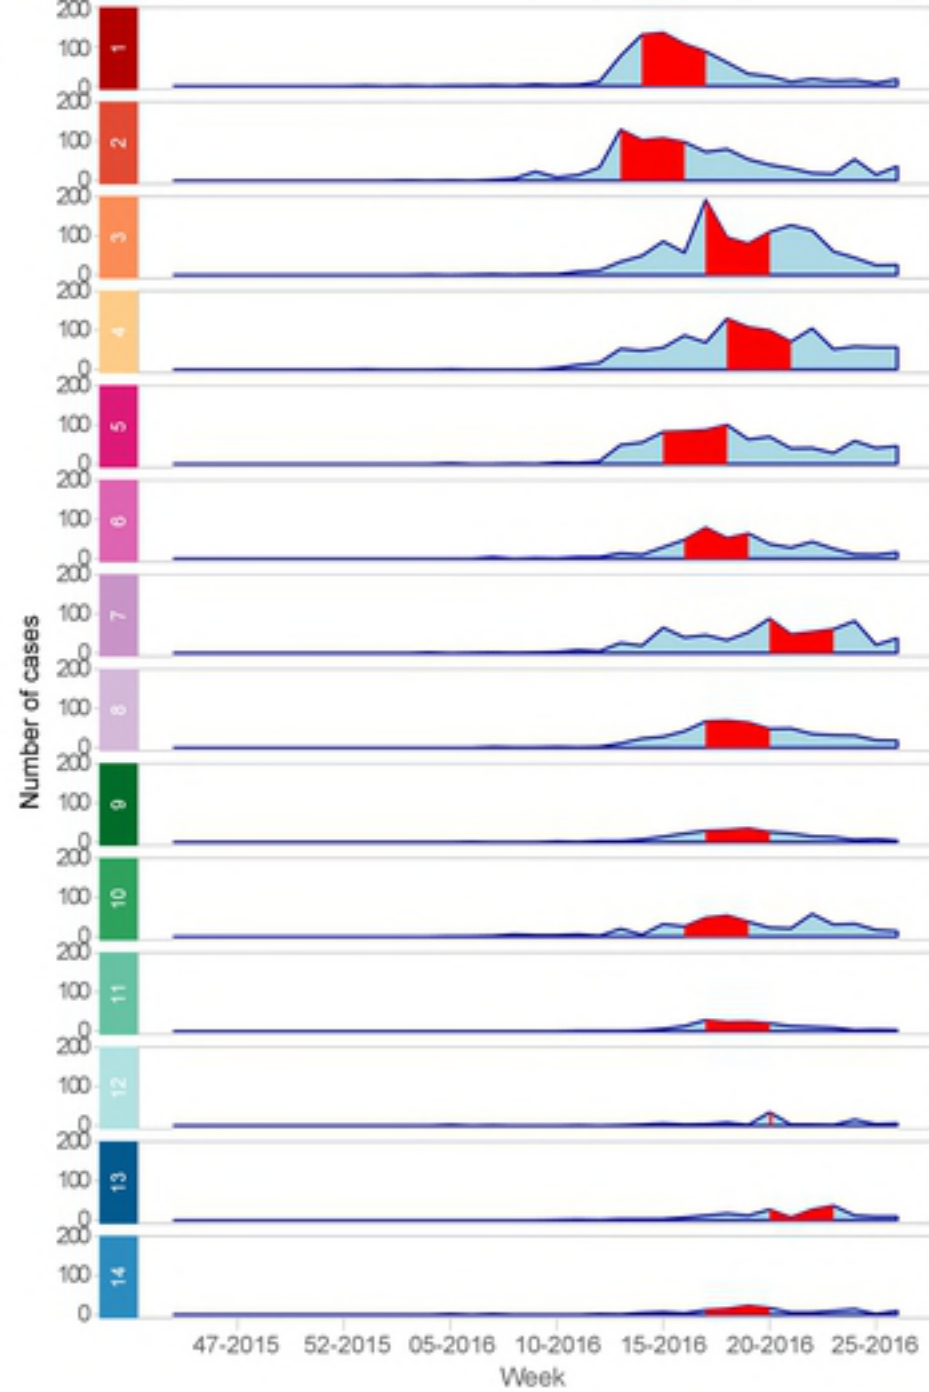

Fig4

**A**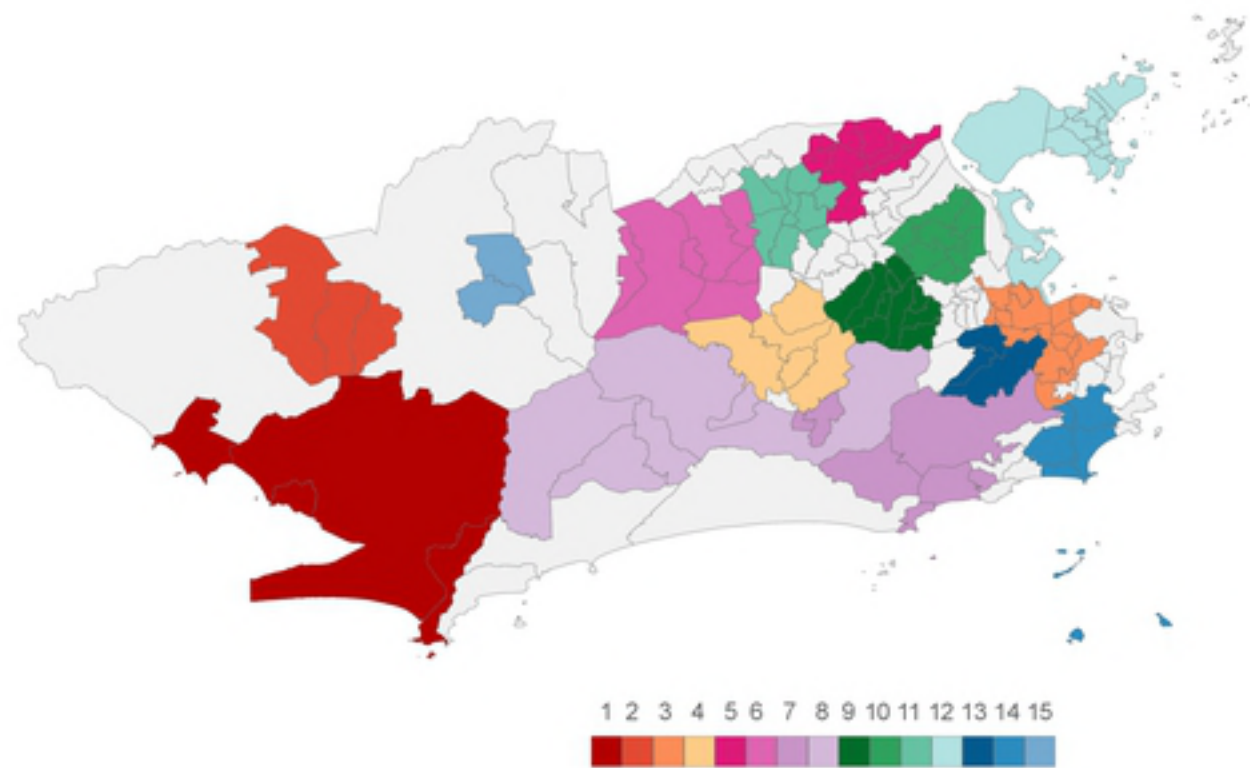**B**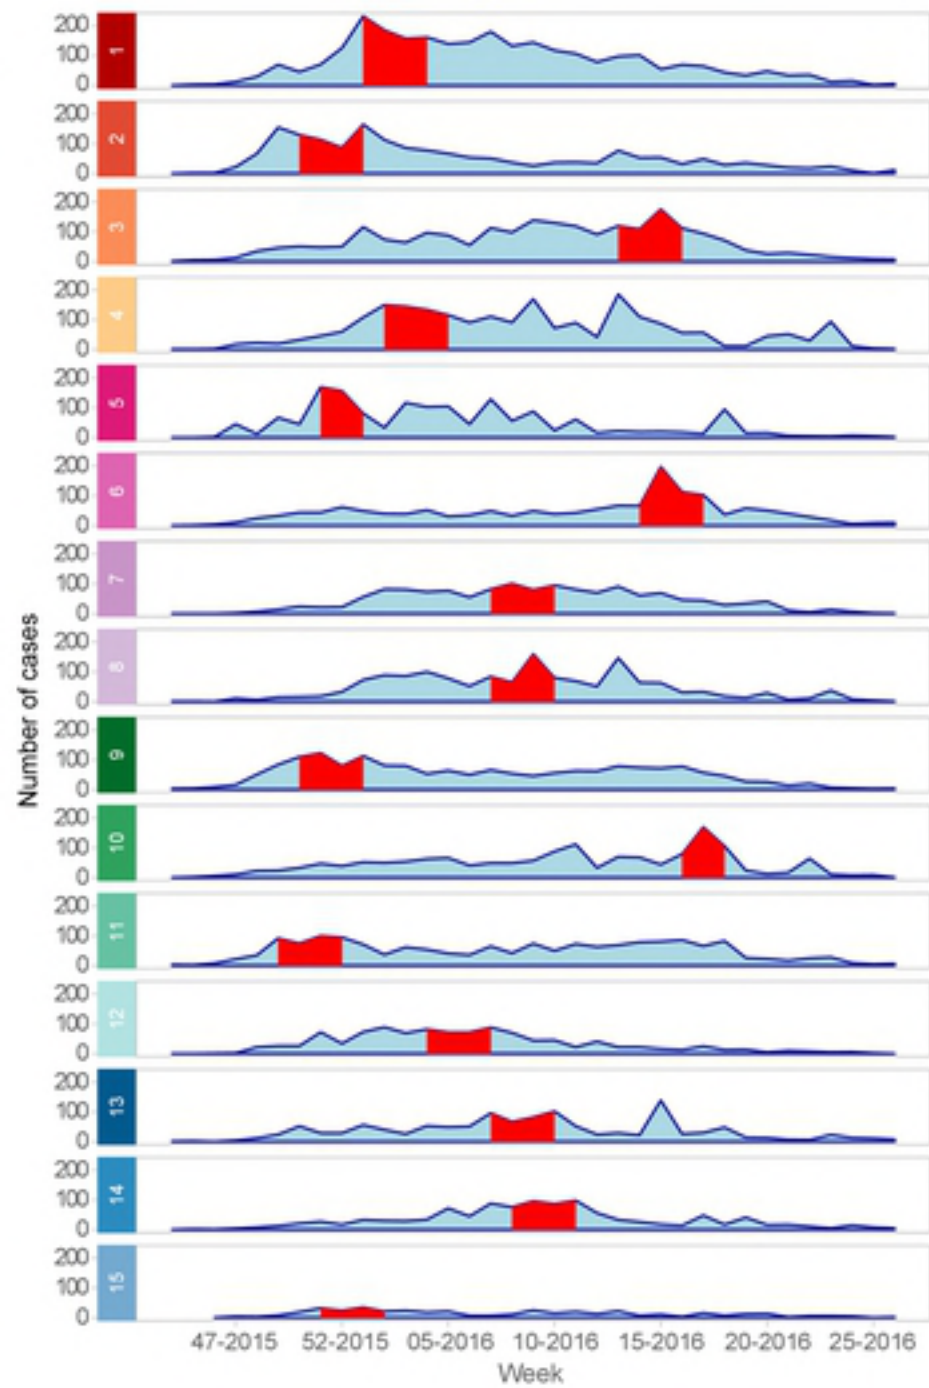**Fig5**

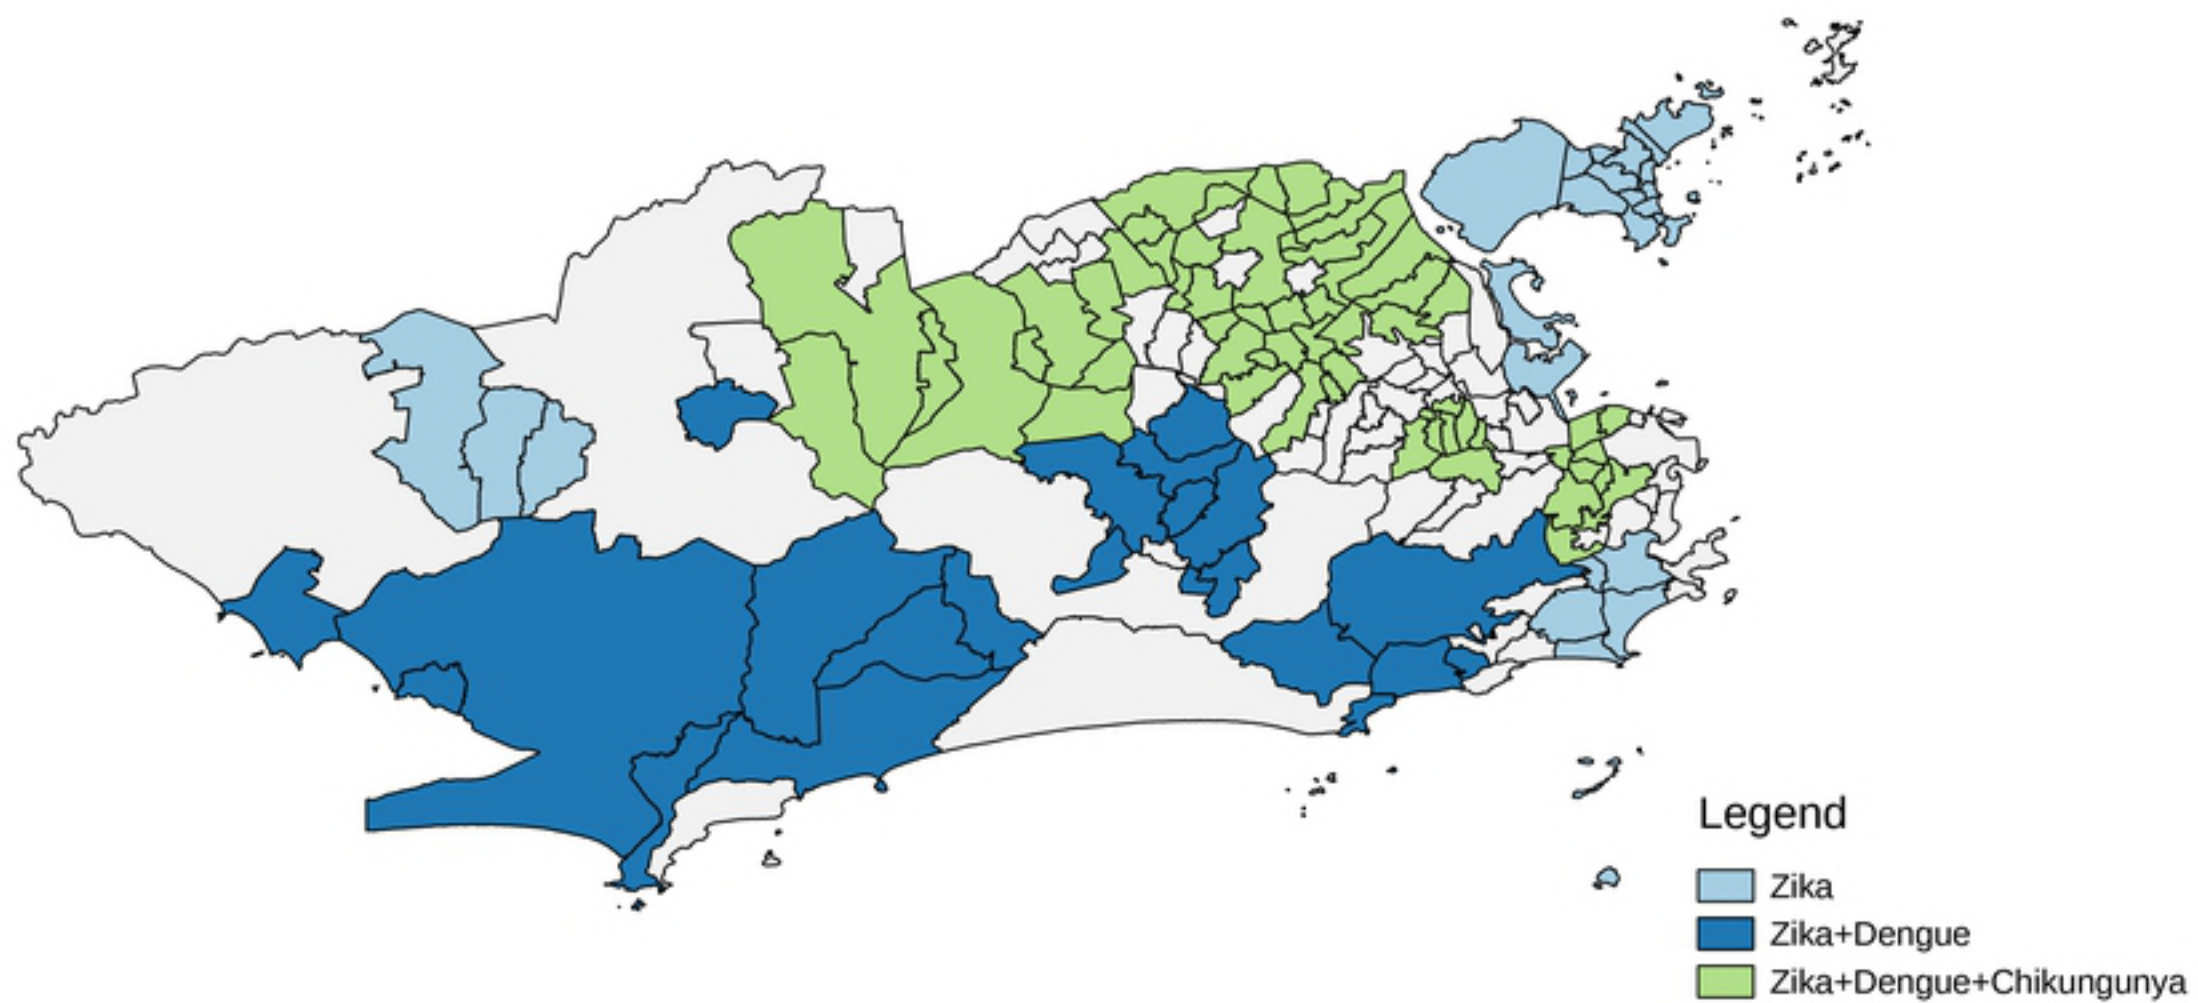

Fig6

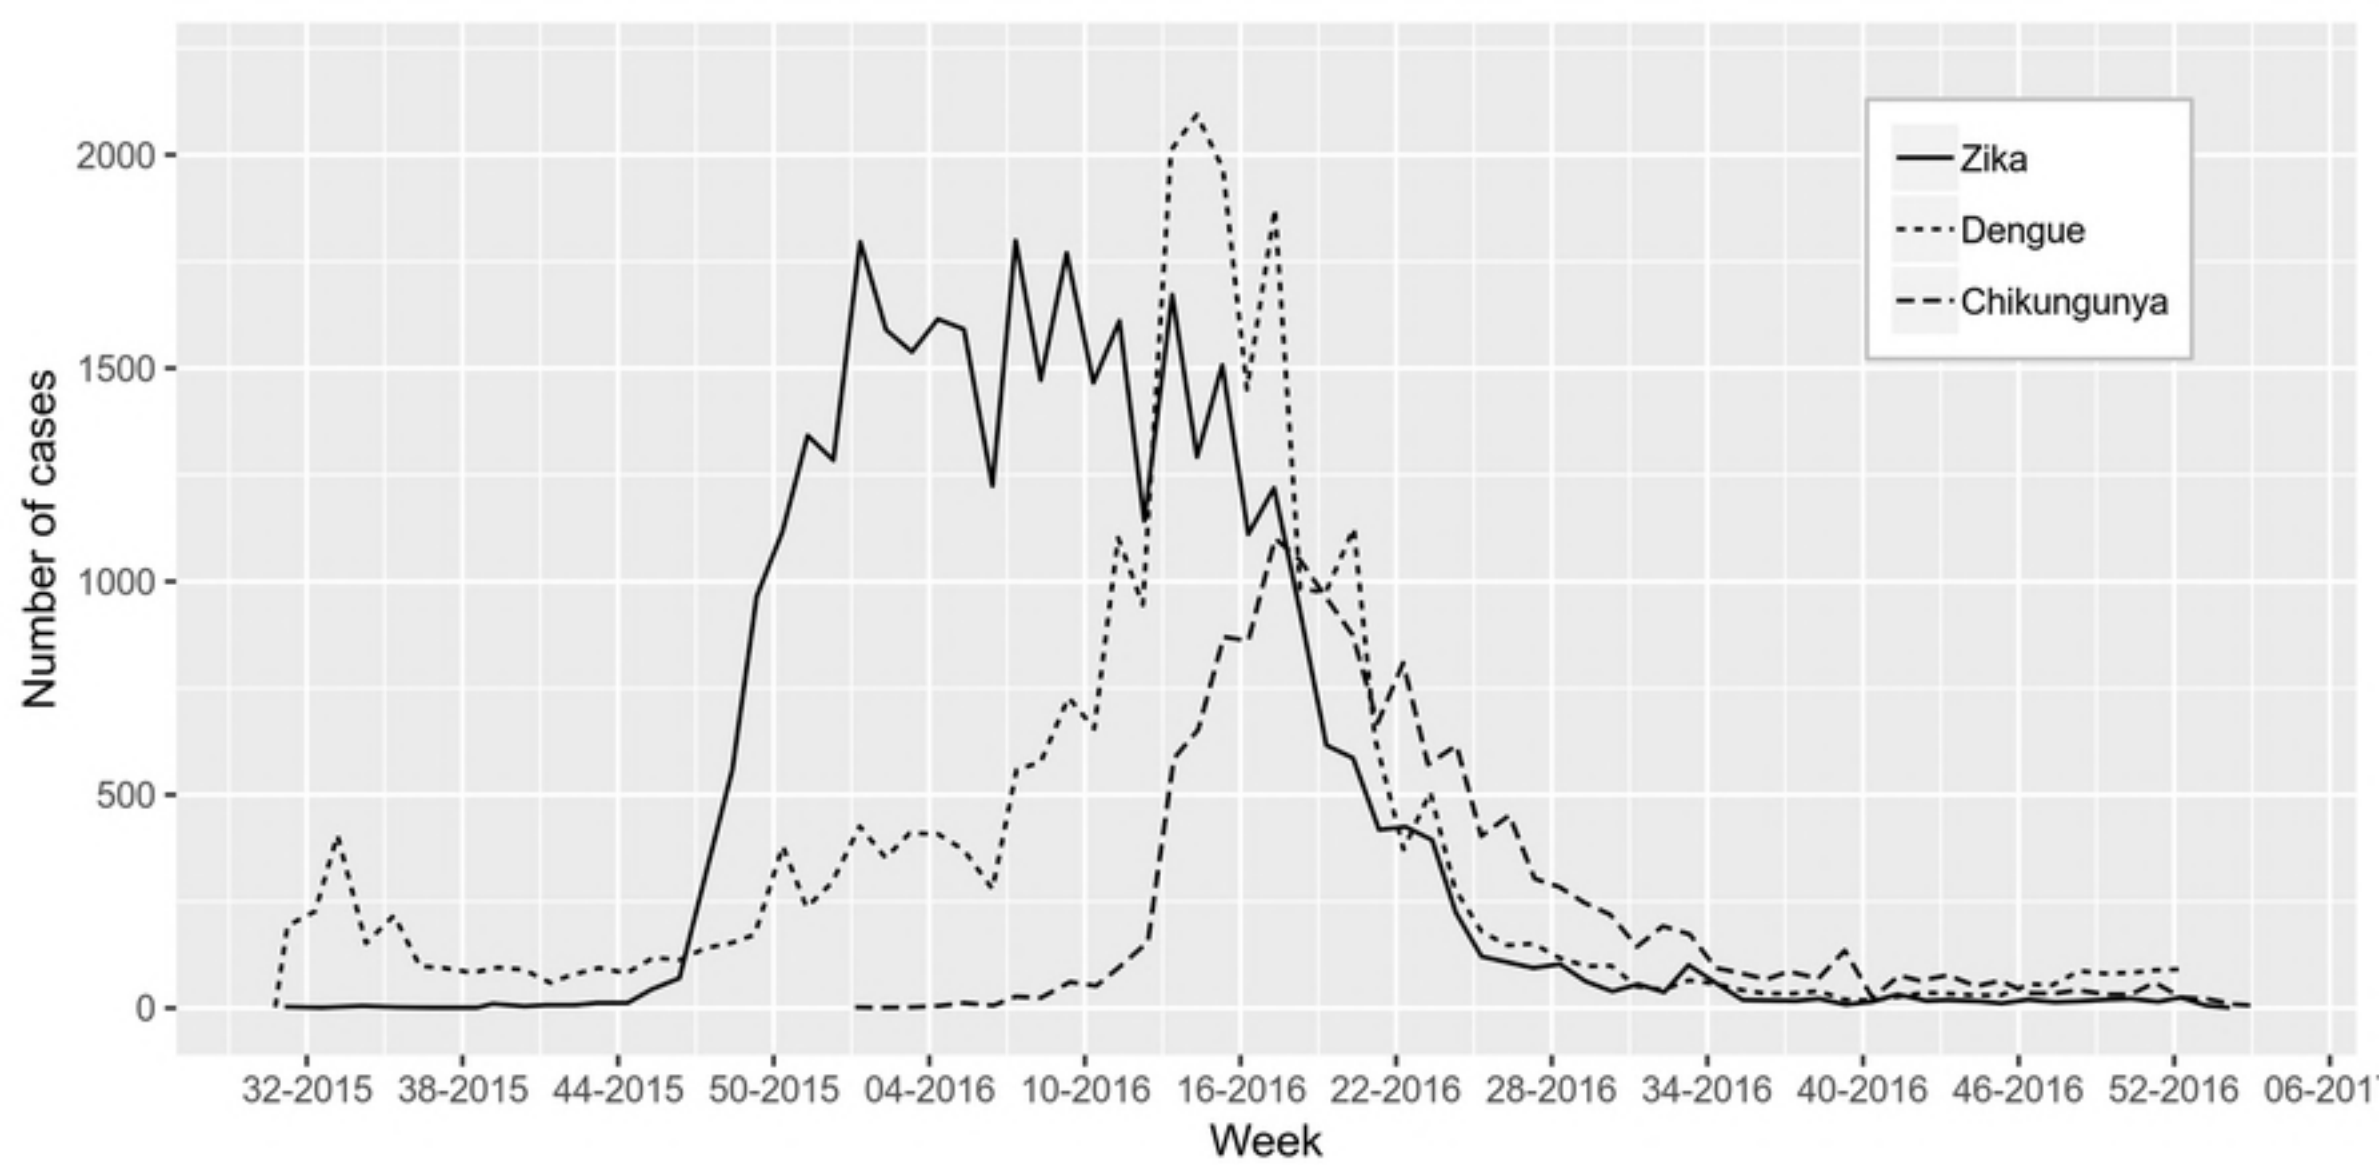

Fig2

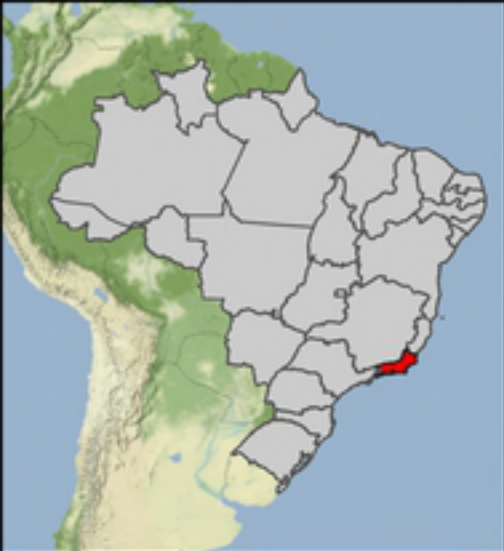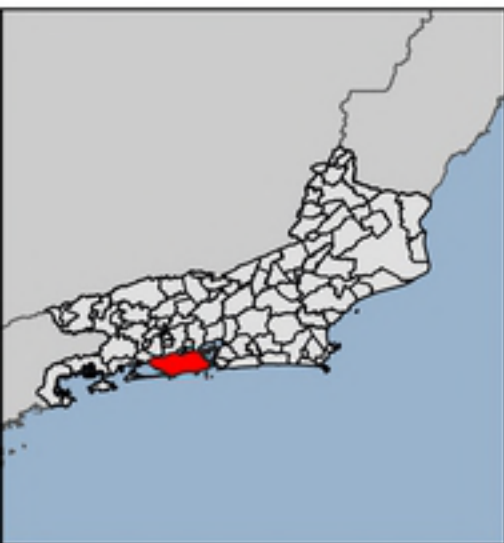

Sources: IGBE, Brazil;  
 Instituto Pereira Passos,  
 Brazil; Stamen Design/  
 OpenStreetMap.

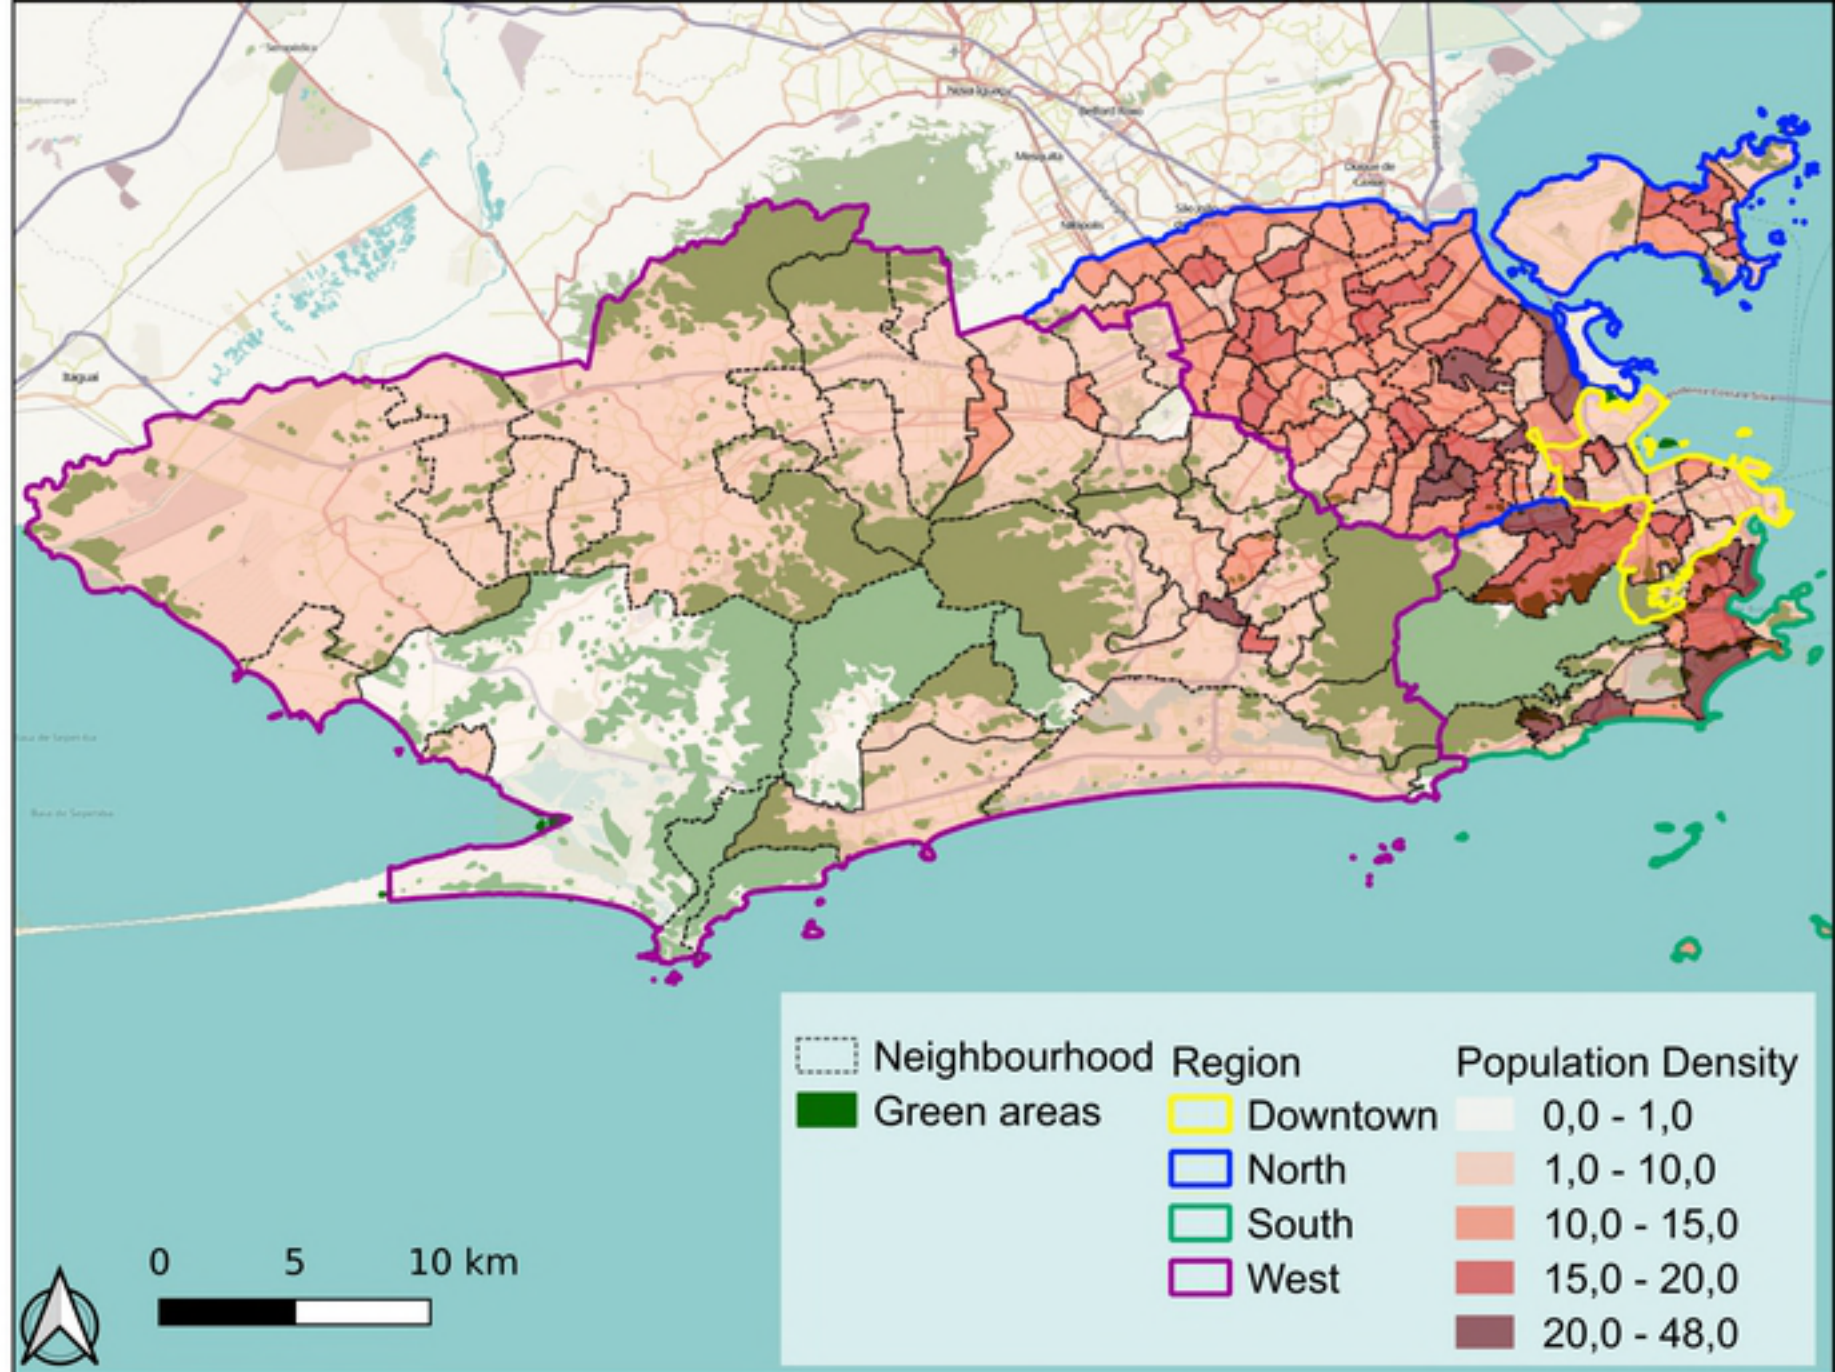

Fig1
